# Supplementary material for: Fucoxanthin prevents septic cardiomyopathy by targeting BRD2 in M1-polarized macrophages
Source: Royal Society of Chemistry journal article supplement (doi:10.1039/d5fo04244e), 2025-12-04
Supplement: d5fo04244e4.pdf [file d5fo04244e4.pdf]

## ARTICLE

### Supplementary Figure Captions

**Fig. S1. Overall condition of experimental mice and single cell sequencing of heart tissue.** (A) Status diagram of mice. (B) Body weight of mice (n=6). (C) Heart to body weigh ratio (n=6). (D) The gross image of mice heart (n=6). UMAP plots illustrate the distribution of 15 distinct immune cell clusters in the hearts of (E) control mice and at (F) 3 days and (G) 7 days after CLP surgery (n = 3). (H) Quantification of cell numbers within each cluster shown in E-G. (I) Quantitative analysis of cardiac M2-polarized macrophages across all groups, assessed by (J) flow cytometry (n=3). For (B-C), the data are normalized to the respective controls. The data are presented as means  $\pm$  SD. One-way ANOVA followed by Dunnett's post hoc test was used to determine statistical significance ( $P < 0.05$ ). \*\*\* $P < 0.001$ , \*\* $P < 0.01$ , \* $P < 0.05$ . Abbreviations: CLP-3d, cecal ligation and puncture three days later; CLP-7d, cecal ligation and puncture seven days later; SS, steady state. Source data are available online for this figure.

**Fig. S2. Molecular docking and experimental validation of FX effects on BET family proteins.** High affinity docking models and schematic interactions of FX with (A) BRD3 and (B) BRD4. The protein levels of (C) BRD3 and (D) BRD4 in hearts of LPS-treated mice with or without FX administration. The protein levels of (E) BRD2, (F) BRD3 and (G) BRD4 in LPS-induced M1-polarized macrophages treated with FX. For (C–G), the data are normalized to respective controls and presented as means  $\pm$  SD (n = 3). One-way ANOVA followed by Dunnett's post hoc test was used to determine statistical significance ( $P < 0.05$ ). \*\*\*\* $P < 0.0001$ , \*\*\* $P < 0.001$ , \*\* $P < 0.01$ , \* $P < 0.05$ . Abbreviations: BRD3, bromodomain containing 3; BRD4, bromodomain containing 4. Other abbreviations are the same as in Figs. 1, 3, 6 & 7. Source data are available online for this figure.

**Fig. S3 Validation of BRD2 overexpression and knockdown efficiency in macrophages.** (A) The transfection efficiency of plasmid in macrophages. (B) The protein level of BRD2 following siRNA transfection at different concentrations (3, 4, and 5  $\mu$ L) in LPS-treated macrophages. The data are presented as means  $\pm$  SD. One-way ANOVA followed by Dunnett's post hoc test was used to determine statistical significance ( $P < 0.05$ ). \*\*\*\* $P < 0.0001$ . The abbreviations are the same as in Figs. 1, 5 & 7. Source data are available online for this figure.
